# Supplementary material for: Spatio-temporal profile, phenotypic diversity, and fate of recruited monocytes into the post-ischemic brain
Source: PubMed Central journal article supplement (PMC5097435; doi:10.1186/s12974-016-0750-0), 2016-11-04

# Garcia-Bonilla et al. Supplemental Figure 1

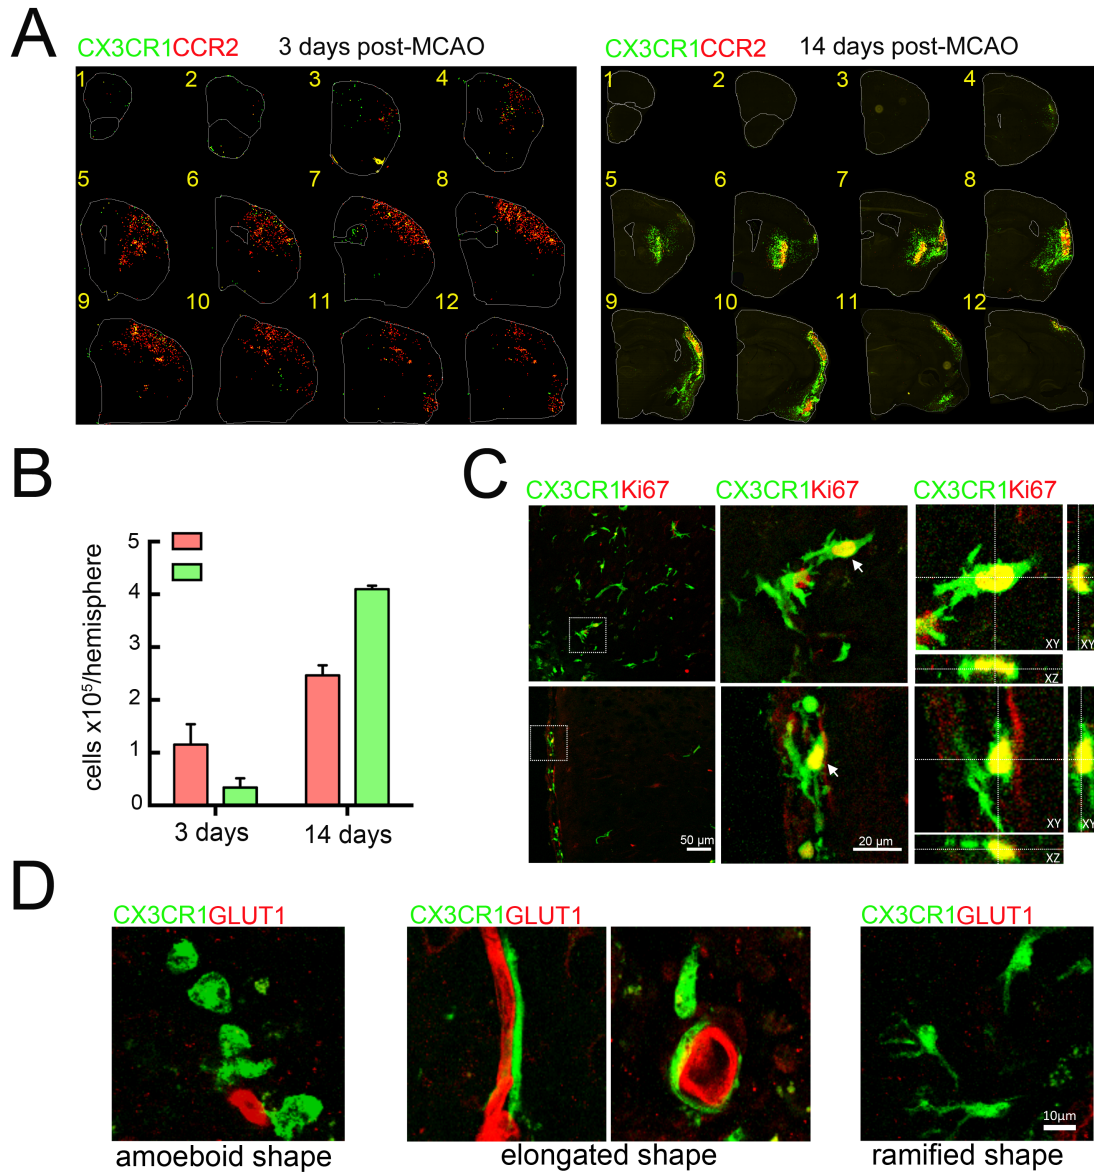

Supplement: 12974_2016_750_MOESM1_ESM.pdf [file 12974_2016_750_MOESM1_ESM.pdf]
