# Supplementary material for: Spatio-temporal profile, phenotypic diversity, and fate of recruited monocytes into the post-ischemic brain
Source: Springer Nature journal article supplement (doi:10.1186/s12974-016-0750-0), 2016-11-04

Garcia-Bonilla et al. Supplemental Figure 3

**A** CX3CR1 Iba1

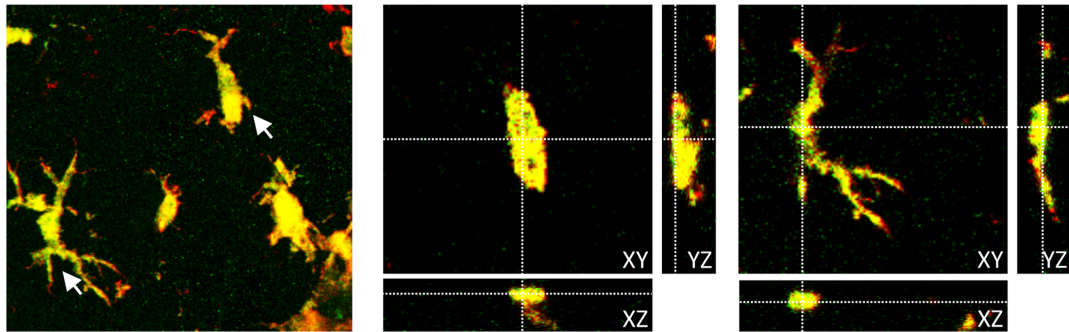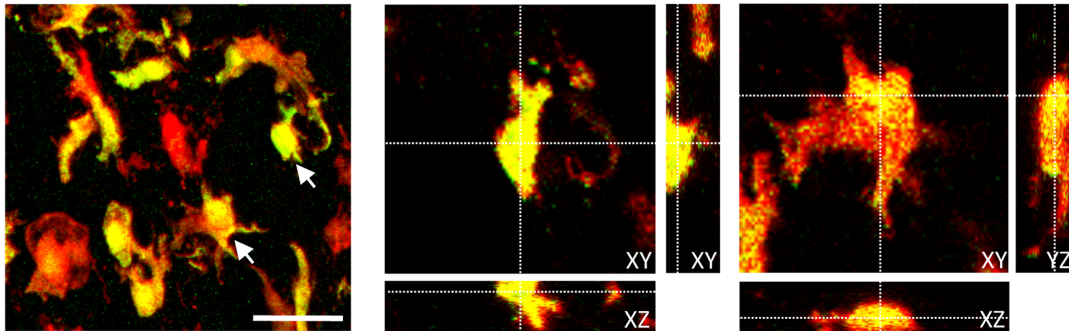

**B** CCR2 Iba1

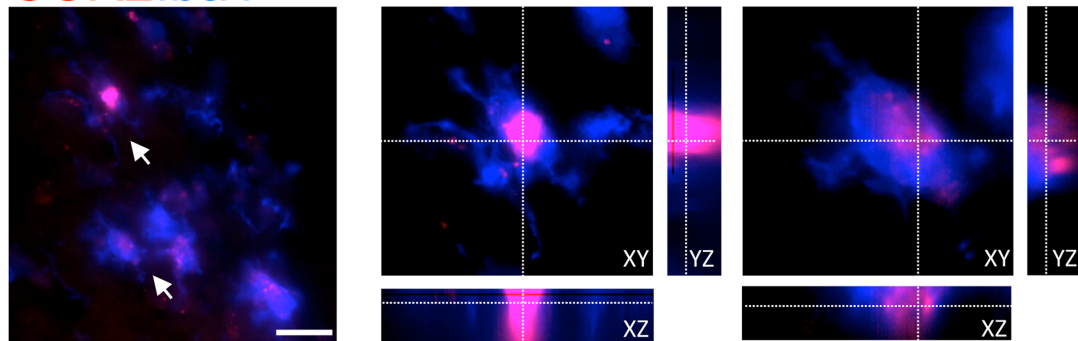

Supplement: MOESM3 [file 11019916]
